# Supplementary material for: Transcriptome-wide identification and characterization of Ornithogalum saundersiae phenylalanine ammonia lyase gene family
Source: Royal Society of Chemistry journal article supplement (doi:10.1039/c4ra03385j), 2014-01-01
Supplement: c4ra03385j1.pdf [file c4ra03385j1.pdf]

**Figure legends:**

Figure 1: The effect of pH on mutants using L-Phe as a substrate. The activity of the enzyme at optimum pH was taken as 100%.

Figure 2: The optimum temperatures for catalyzing L-Phe of mutants. The activity of the enzyme at optimum temperature was taken as 100%.

Figure 3: Effect of temperatures and pH on mutants to catalyze L-Tyr. The activity of the enzyme at optimum pH or temperature was taken as 100%.

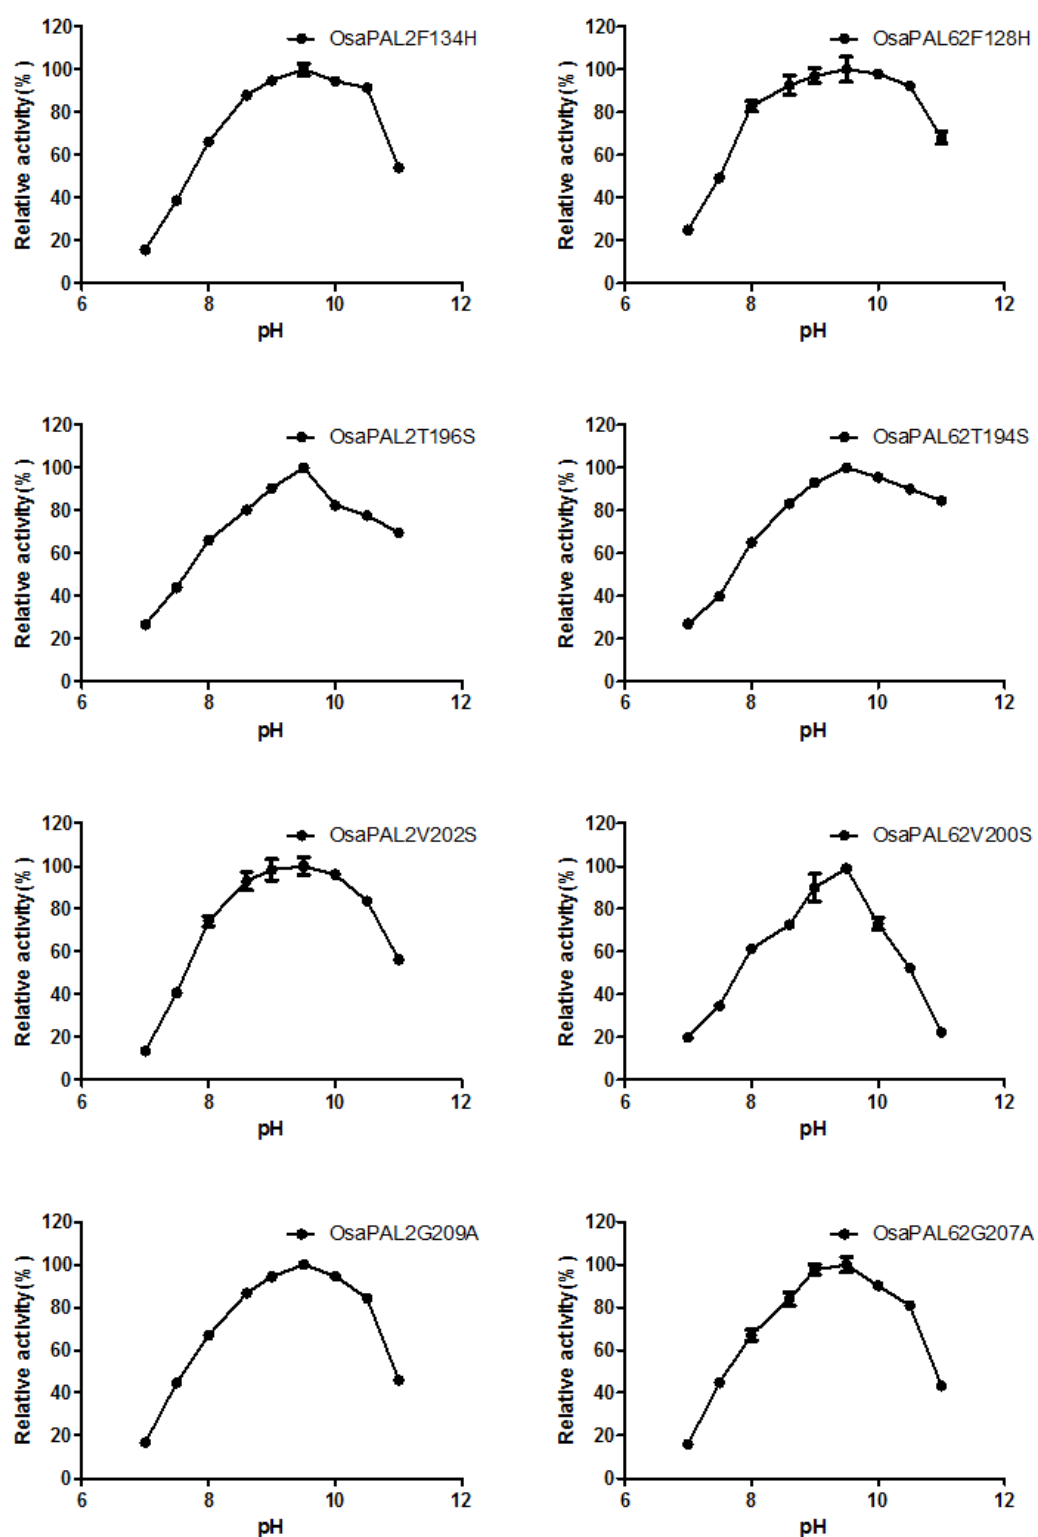

Figure 1

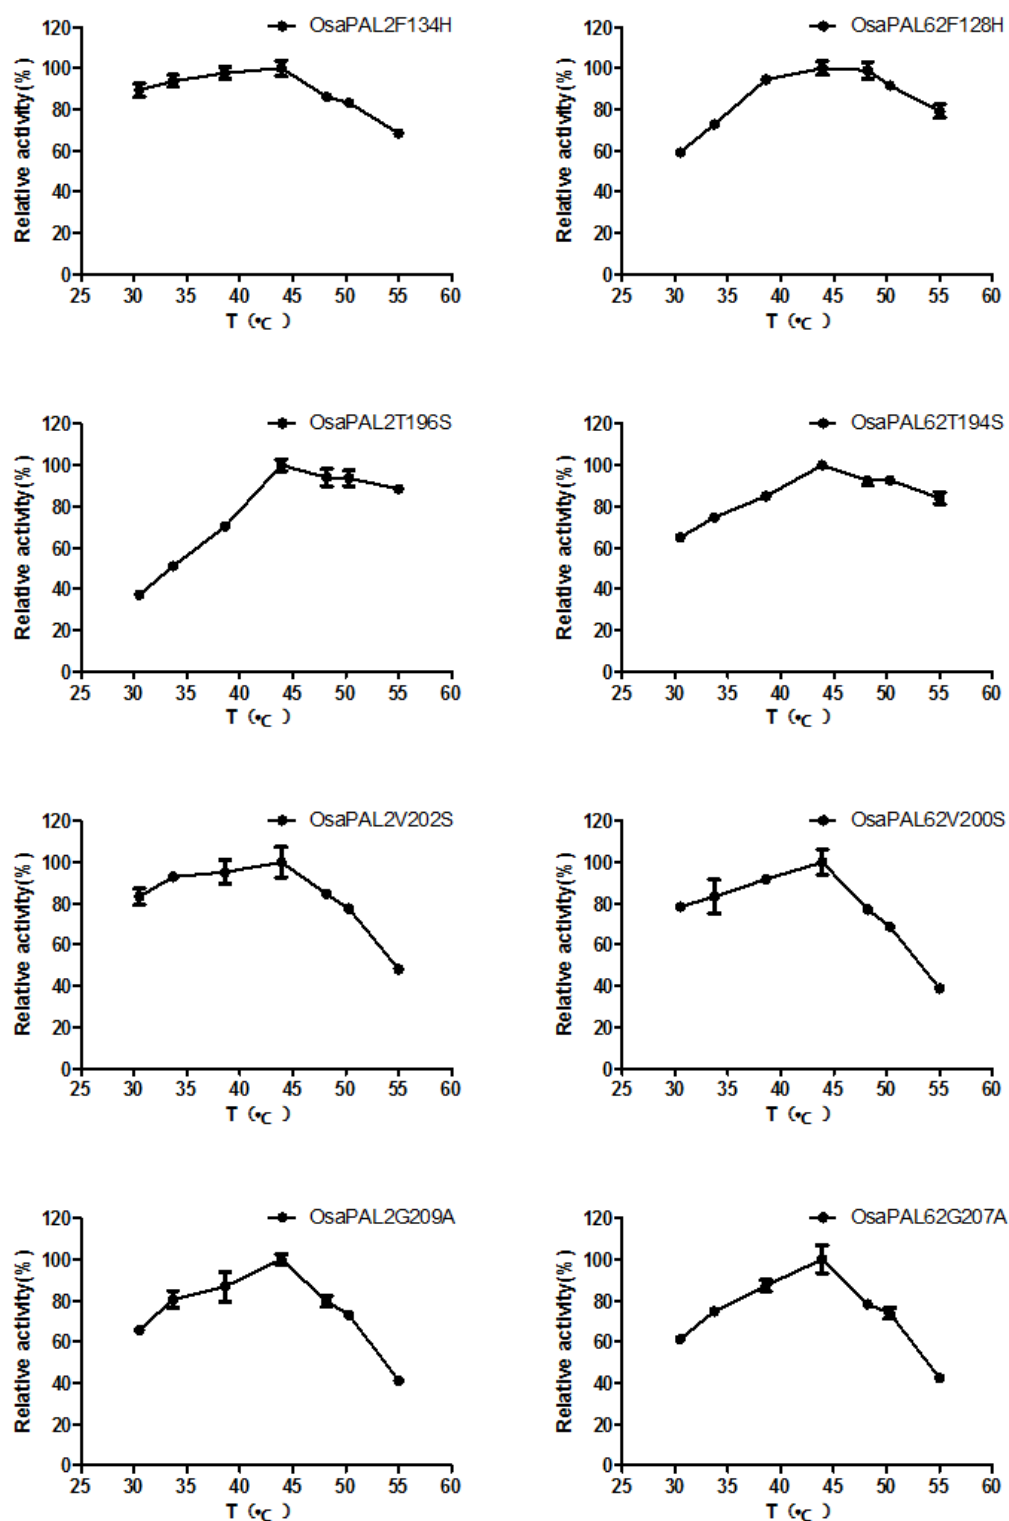

Figure 2

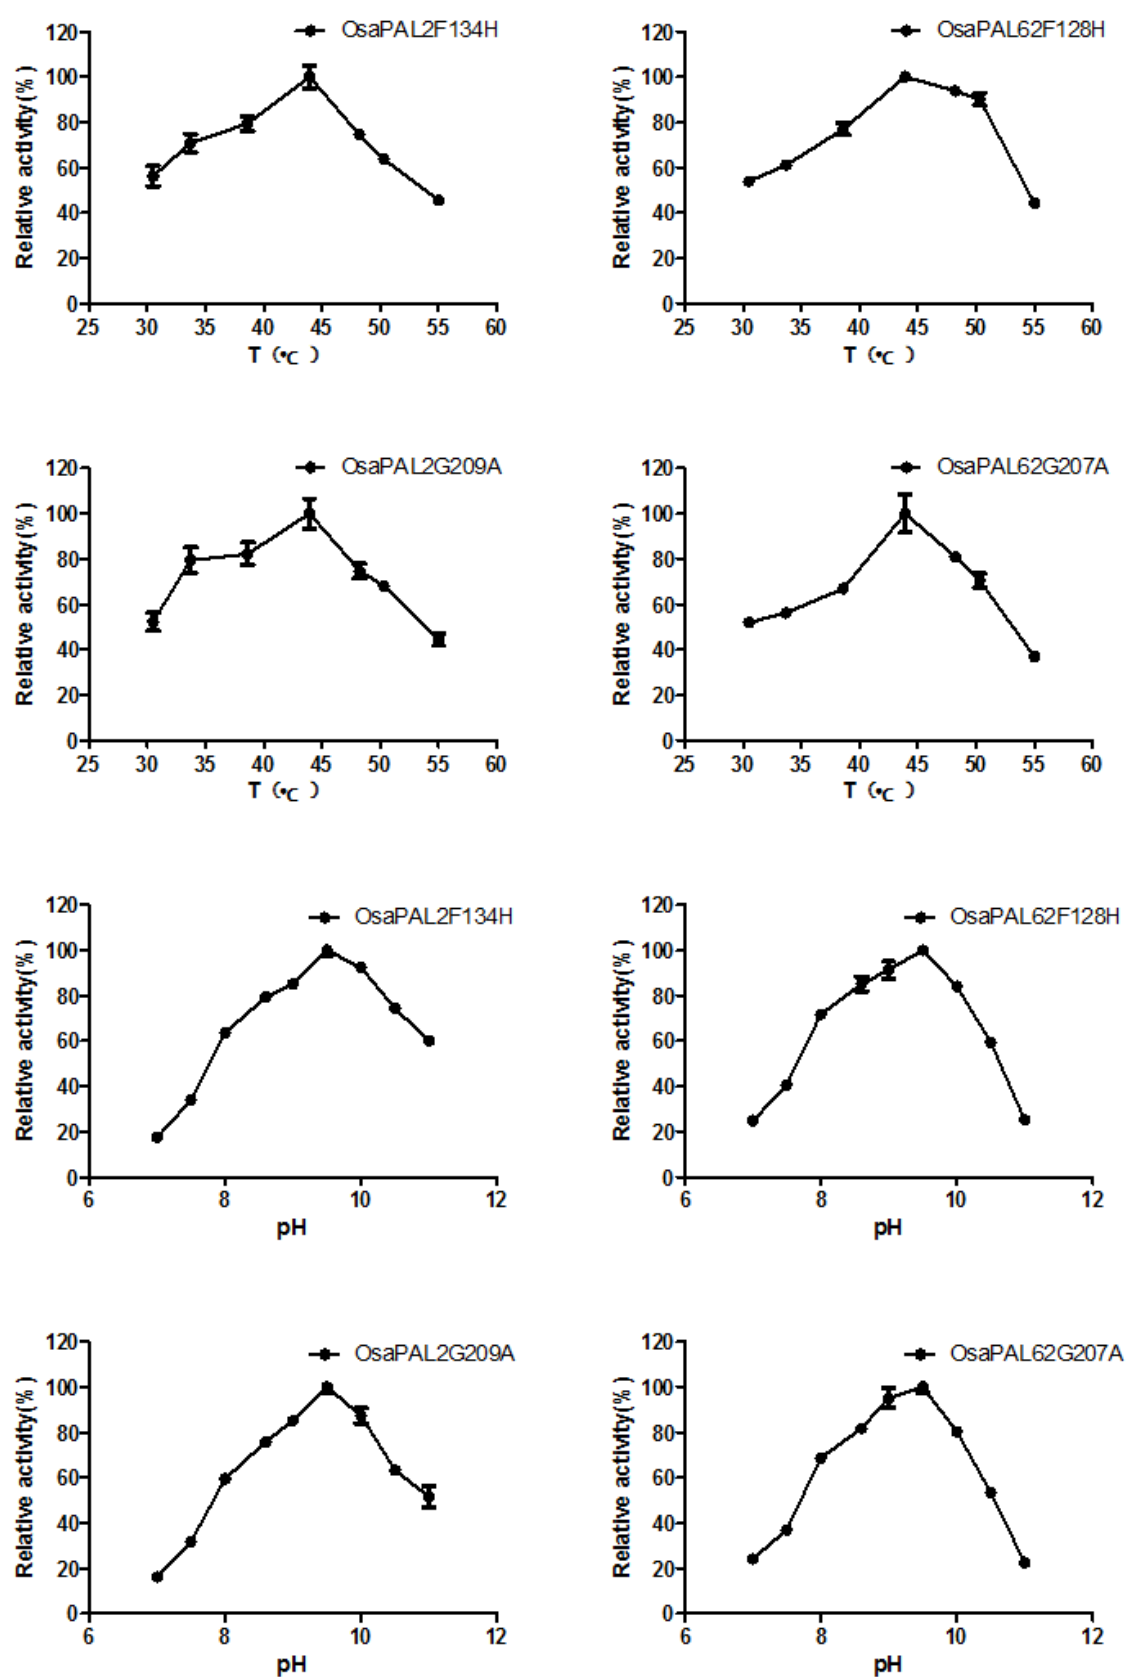

Figure 3
